# Supplementary material
Source: Springer Nature journal article supplement (https://www.springermedizin.de/resource/supplementary/13002_2012_280_MOESM8_ESM.pdf/9627534)

### Waca Playa

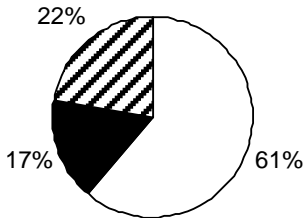

### Pitumarca

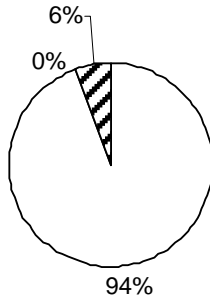

- Natural remedies
- Pharmaceuticals
- ▨ No preference

Supplement: MOESM8 [file 9627534]
